# Supplementary material for: Association of body-mass index with physiological brain pulsations across adulthood– a fast fMRI study
Source: Research Square preprint supplement (doi:10.21203/rs.3.rs-3498859/v1), 2023-11-15
Supplement: Supplementary file 1 [file b52aa7407603c7c3320ed8ef.xlsx]

## Sheet: Sheet1
Parameter	Range	Group mean ± SD
Age (years)	19 - 74	45.3 ± 16.4
Gender (Female/male ratio)		76/39
Height (cm)	152 - 200	169.7 ± 9.2
Weight (kg)	49 - 140	74.9 ± 15.1
Body-mass index (kg/m2)	17.4 - 38.5	25.9 ± 4.1
Systolic blood pressure (mmHg)	104 - 187	141.8 ± 20.1
Diastolic blood pressure (mmHg)	51 - 108	79.2 ± 11.6
Pulse pressure (mmHg)	39 - 97	62.6 ± 12.9
